# Supplementary material
Source: PubMed Central journal article supplement (PMC4835303)
Supplement: aasm.39.5.1051s1.pdf [file aasm.39.5.1051s1.pdf]

**Table S1**—Numbers of potential cases ascertained at each centre, numbers excluded and numbers included in the final analysis.

| Centre            | Centre visit date | Number of potential cases identified at centre visits | Reasons for initial exclusions at centre visits |                                                 |                         | Expert review                             |                          |                                                         | Final number (aged $\geq 18$ years at September 2009) |
|-------------------|-------------------|-------------------------------------------------------|-------------------------------------------------|-------------------------------------------------|-------------------------|-------------------------------------------|--------------------------|---------------------------------------------------------|-------------------------------------------------------|
|                   |                   |                                                       | First symptoms before 2009                      | Diagnosis of narcolepsy not confirmed by centre | Notes missing/duplicate | Clear case <u>not</u> reviewed by experts | Reviewed by expert panel | Not narcolepsy/insufficient evidence after panel review |                                                       |
| St Thomas' London | 09/11/2012        | 220                                                   | 171                                             | 26                                              | 0                       | 7                                         | 16                       | 7                                                       | 16 (2)                                                |
| UCL, London       | 15/04/2013        | 76                                                    | 58                                              | 14                                              | 0                       | 3                                         | 1                        | 0                                                       | 4                                                     |
| Cambridge         | 21/06/2013        | 368                                                   | 197                                             | 152                                             | 0                       | 8                                         | 11                       | 9                                                       | 10 (2)                                                |
| Sheffield         | 20/11/2013        | 167                                                   | 101                                             | 61                                              | 1                       | 4                                         | 0                        | 0                                                       | 4                                                     |
| Leicester         | 12/06/2013        | 249                                                   | 108                                             | 135                                             | 0                       | 3                                         | 3                        | 3                                                       | 3 (1)                                                 |
| Middlesbrough     | 04/02/2014        | 366                                                   | 291                                             | 53                                              | 10                      | 5                                         | 7                        | 1                                                       | 11 (3)                                                |
| All               |                   | 1446                                                  | 926                                             | 441                                             | 11                      | 30                                        | 38                       | 20                                                      | 40 (8)                                                |
